# Supplementary material for: Sustainable development of coconut shell activated carbon (CSAC) & a magnetic coconut shell activated carbon (MCSAC) for phenol (2-nitrophenol) removal
Source: Royal Society of Chemistry journal article supplement (doi:10.1039/c6ra19756f), 2016-01-01
Supplement: c6ra19756f1.pdf [file c6ra19756f1.pdf]

**Table SM1. EDXRF analyses of CSAC and MCSAC**

| Element | CSAC        | MCSAC      |
|---------|-------------|------------|
| P       | 2.62%       | 6.757%     |
| K       | 939.76 ppm  | 958.69 ppm |
| Ca      | 1518.87 ppm | 0.31 %     |
| Fe      | 0.405 ppm   | 92.58 %    |
| Cu      | -           | -          |
| Zn      | 0.21%       | -          |
| Cl      | -           | 0.25%      |

**Table SM2. Description of equations used in the Manuscript**

| <b>Equation/model name</b>                    | <b>Mathematical expression</b>                              | <b>Parameters</b>                                                                                                                                                                                                           | <b>Equation no.</b> |
|-----------------------------------------------|-------------------------------------------------------------|-----------------------------------------------------------------------------------------------------------------------------------------------------------------------------------------------------------------------------|---------------------|
| Helium density ( $\rho_{He}$ ) measurement    | $\rho_{Hg} = M/V_s$                                         | M is the mass of sample, and $V_s$ is the sample volume                                                                                                                                                                     | <b>SM1</b>          |
|                                               | $\rho_{He} = M/V'_s$                                        | M is the mass of sample, $V'_s$ is the sample volume inaccessible to helium.                                                                                                                                                | <b>SM2</b>          |
| Dubinin-Radushkevich equation                 | $\log W = \log W_0 - D \log^2 \left( \frac{p^0}{p} \right)$ | W stands for micropore volume filled with liquid $N_2$ when the relative pressure is $p/p^0$ and $W_0$ is the total micropore volume. D stands for a characteristic constant for the microporous structure of the adsorbent | <b>SM3</b>          |
| Total pore volume ( $V_T$ )                   | $V_T = \frac{1}{\rho_{Hg}} - \frac{1}{\rho_{He}}$           | $\rho_{Hg}$ and $\rho_{He}$ are mercury and helium densities                                                                                                                                                                | <b>SM4</b>          |
| Pseudo-first-order rate equation (linear)     | $\ln \left( \frac{q_e - q_t}{q_e} \right) = -k_1 t$         | $q_e$ is the equilibrium adsorption capacity, $q_t$ is the adsorption capacity at time 't', $k_1$ is the rate constant, t is time                                                                                           | <b>SM5</b>          |
| Pseudo-first-order rate equation (non-linear) | $q_t = q_e (1 - e^{-k_1 t})$                                | $q_e$ is the equilibrium adsorption capacity, $q_t$ is the adsorption capacity at time 't', $k_1$ is the rate constant, t is time                                                                                           | <b>SM6</b>          |

|                                            |                                                               |                                                                                                                                                                                                                                                                                                                                                                                                  |             |
|--------------------------------------------|---------------------------------------------------------------|--------------------------------------------------------------------------------------------------------------------------------------------------------------------------------------------------------------------------------------------------------------------------------------------------------------------------------------------------------------------------------------------------|-------------|
| Pseudo-second-order rate equation (linear) | $\frac{t}{q_t} = \frac{1}{k_2 q_e^2} + \frac{t}{q_e}$         | t = time, $k_2$ is pseudo-second-order adsorption rate constant ( $\text{g mg}^{-1} \text{min}^{-1}$ ), $q_e$ is the amount of 2-NP adsorbed at equilibrium and $q_t$ the amount of 2-NP adsorbed at time “t”.                                                                                                                                                                                   | <b>SM7</b>  |
| Freundlich isotherm model                  | $q_e = K_F C_e^{1/n}$                                         | $q_e$ is the 2-NP amount adsorbed per unit weight of adsorbent (mg/g), $K_F$ and $1/n$ are constants, $C_e$ is the equilibrium 2-NP concentration                                                                                                                                                                                                                                                | <b>SM8</b>  |
| Langmuir isotherm model                    | $Q_e = \frac{Q^0 b C_e}{1 + b C_e}$                           | $q_e$ is the 2-NP amount adsorbed per unit weight of adsorbent (mg/g), $C_e$ is the 2-NP equilibrium concentration in solution (mg/L), $Q^0$ is the monolayer adsorption capacity (mg/g) and constant $b$ is related to the net enthalpy, $H$ , of adsorption ( $b \propto e^{-\Delta H/RT}$ ). More precisely, “ $b$ ” is the reciprocal of concentration at which half saturation is attained. | <b>SM9</b>  |
| Sips isotherm model                        | $Q_e = \frac{K_{LF} C_e^{n_{LF}}}{1 + (a_{LF} C_e)^{n_{LF}}}$ | $K_{LF}$ , $a_{LF}$ and $n_{LF}$ are the Sips constants                                                                                                                                                                                                                                                                                                                                          | <b>SM10</b> |

**Table SM3. Fixed-bed column parameters and equations used for 2-NP removal by CSAC**

| Equation                                                                                                     | Parameters                                                                                                                                                                                                                                                                        | Equation No. |
|--------------------------------------------------------------------------------------------------------------|-----------------------------------------------------------------------------------------------------------------------------------------------------------------------------------------------------------------------------------------------------------------------------------|--------------|
| $t_x = \frac{V}{F_m}$                                                                                        | $F_m$ is the mass flow rate expressed as mass per unit cross-sectional bed                                                                                                                                                                                                        | SM11         |
| $t_\delta = \frac{\bar{V}_x - \bar{V}_b}{F_m}$                                                               | $\bar{V}_x$ , is the total effluent mass quantity per unit adsorbent area when adsorbent is approaching saturation, $\bar{V}_b$ is total effluent mass quantity per unit adsorbent area at breakpoint, $F_m$ is the mass flow rate expressed as mass per unit cross-sectional bed | SM12         |
| $\frac{\delta}{D} = \frac{t_\delta}{t_x - t_b}$                                                              | $D$ is the ratio of carbon bed depth, $t_b$ is the time required for initial PAZ formation, $t_\delta$ is the time required for the zone moving down to its own length in the column, $t_x$ is the total time consumed by the primary adsorption zone establishment               | SM13         |
| $f = 1 - \frac{t_b}{t_\delta}$                                                                               | $f$ is the fractional capacity                                                                                                                                                                                                                                                    | SM14         |
| $\delta = D \left( 1 - \frac{t_b}{t_x} \right)$                                                              | $\delta$ is the length of the primary adsorption zone, $D$ is the ratio of carbon bed depth, $t_x$ is the total time consumed by the primary adsorption zone establishment                                                                                                        | SM15         |
| Percent Saturation = $\frac{D + \delta(f - 1)}{D} * 100$                                                     | -                                                                                                                                                                                                                                                                                 | SM16         |
| Bed Volume = $\frac{\text{Weight of Carbon (Kg)}}{\text{Carbon bulk density (Kg/m}^3\text{)}}$               | -                                                                                                                                                                                                                                                                                 | SM17         |
| EBCT = $\frac{\text{Bed volume}}{\text{Flow rate}}$                                                          | -                                                                                                                                                                                                                                                                                 | SM18         |
| Carbon usage rate (Kg/L) = $\frac{\text{Weight of carbon in columg (g)}}{\text{Volume of breakthrough (L)}}$ | -                                                                                                                                                                                                                                                                                 | SM19         |

|        |  |  |
|--------|--|--|
| * 1000 |  |  |
|--------|--|--|

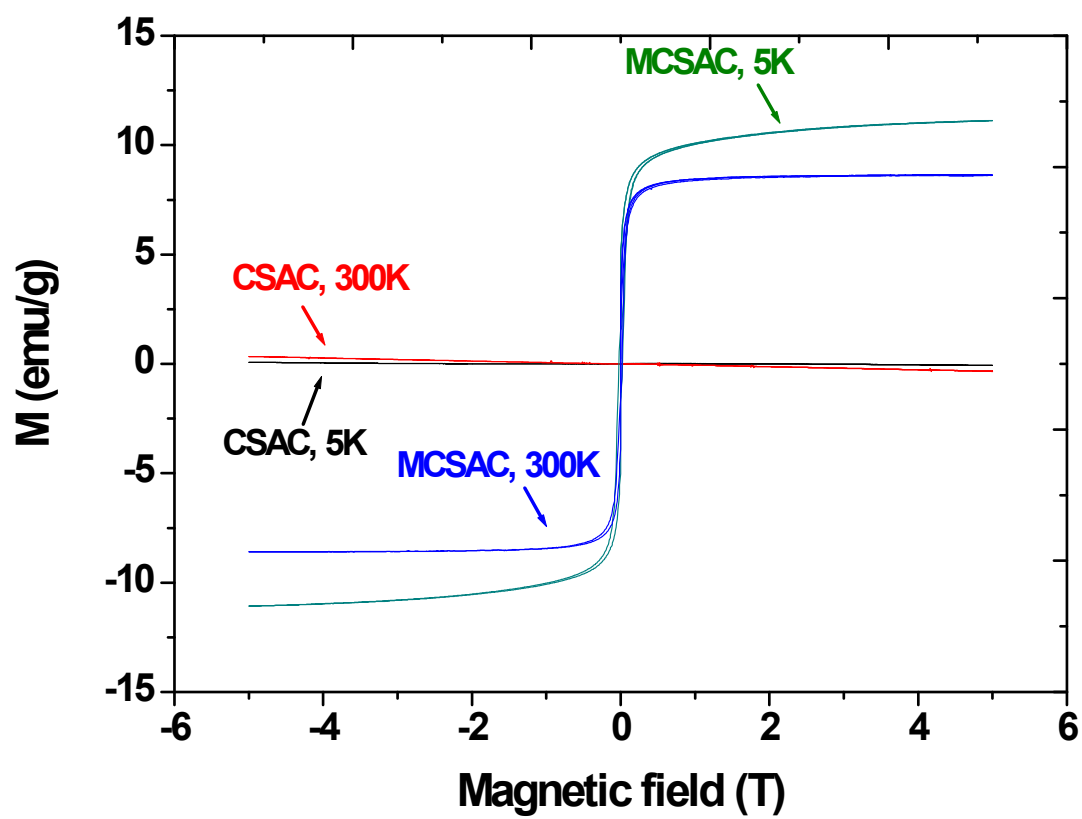

Figure SM1. Hysteresis loops of CSAC and MCSAC at 5 and 300 K.

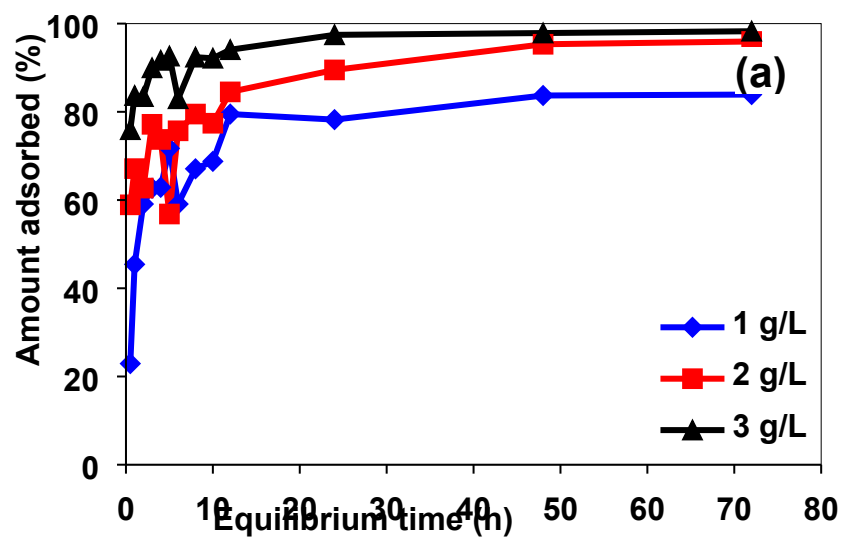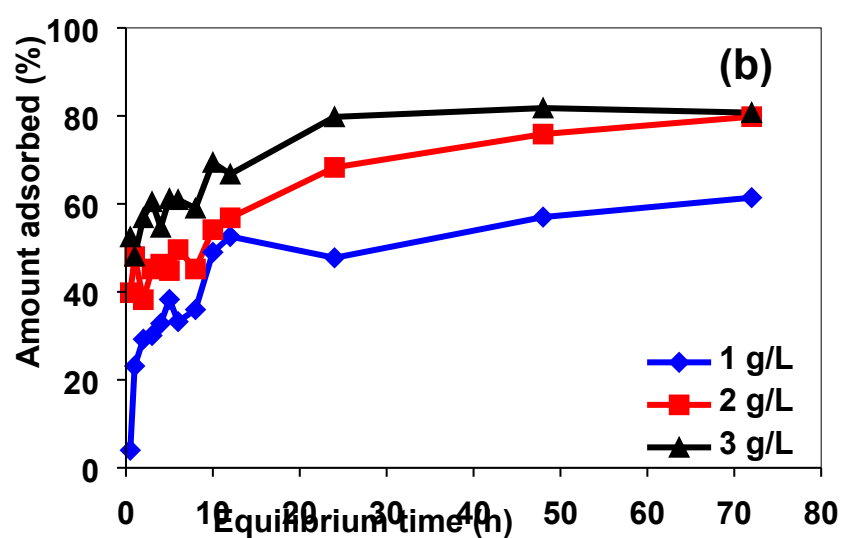

Figure SM2. Effect of adsorbent dose on 2-NP adsorption by (a) CSAC and (b) MCSAC [pH 4.0; 2-NP concentration=  $1 \times 10^{-3}$  M; temperature= 25 °C; particle size= 50-100 B.S.S mesh]

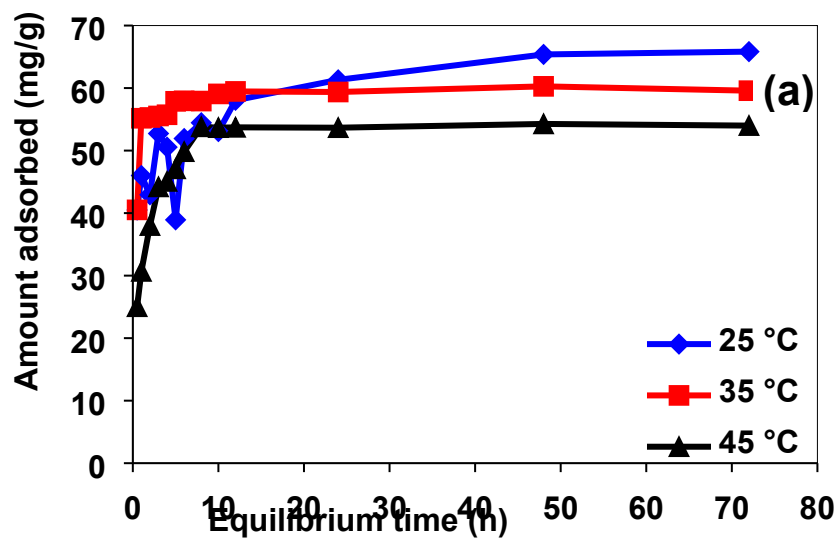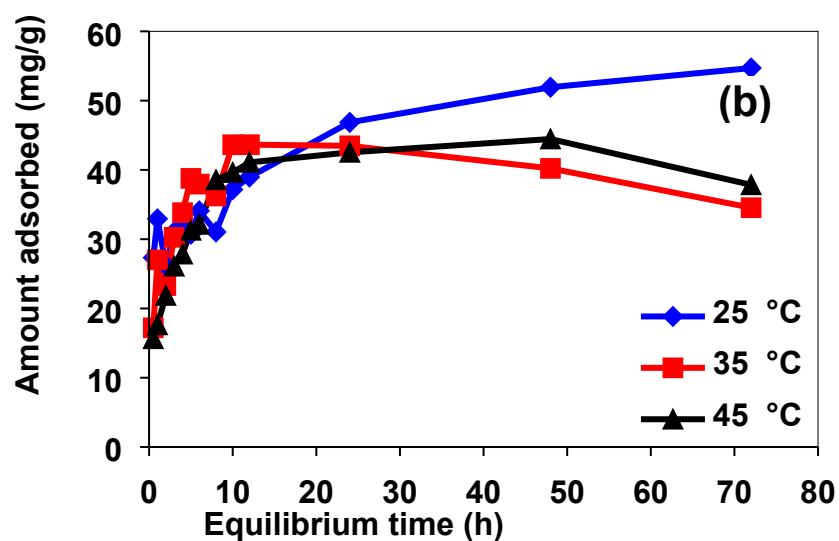

Figure SM3. Effect of temperature on 2-NP adsorption by (a) CSAC and (b) MCSAC [pH 4.0; 2-NP concentration=  $1 \times 10^{-3}$  M; adsorbent dose= 2 g/L; particle size= 50-100 B.S.S mesh]



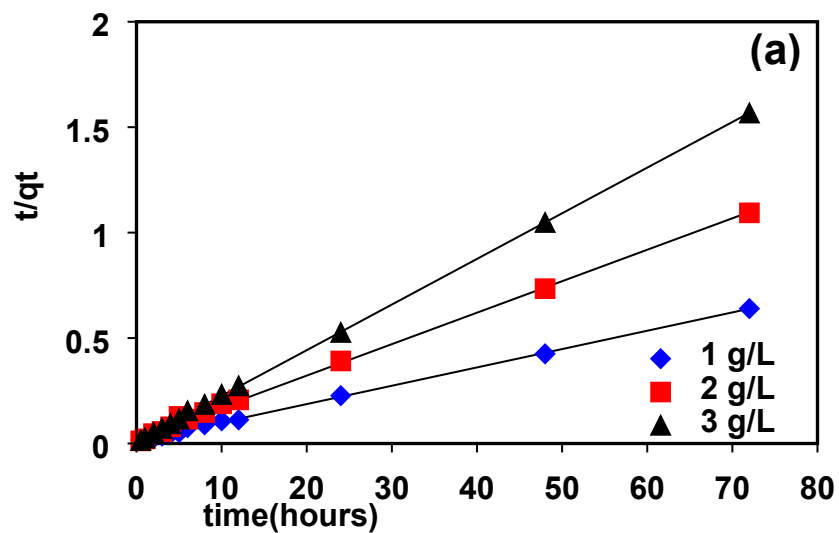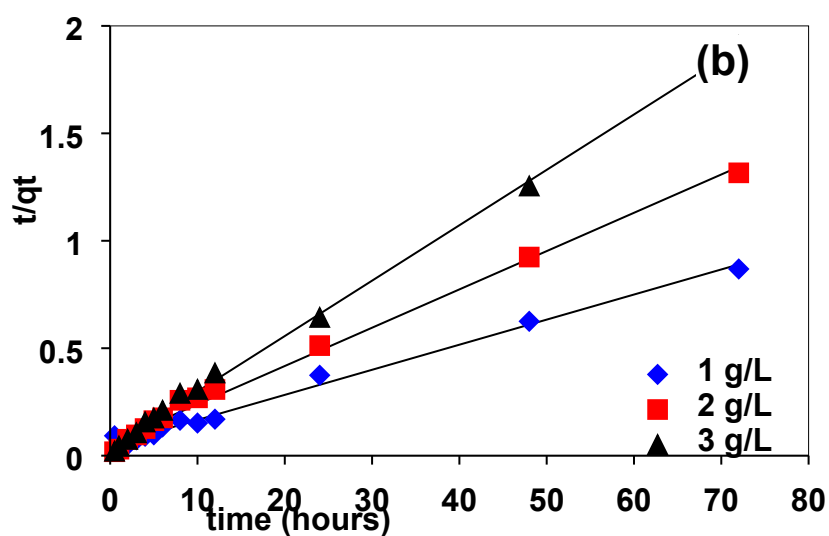

Figure SM4. Pseudo-second-order kinetic plots for 2-NP removal by (a) CSAC and (b) MCSAC at adsorbent dose [initial 2-NP concentration =  $1 \times 10^{-3}$  M; pH = 4.0, adsorbent dose = 2 g/L; particle size = 50-100 B.S.S. mesh]

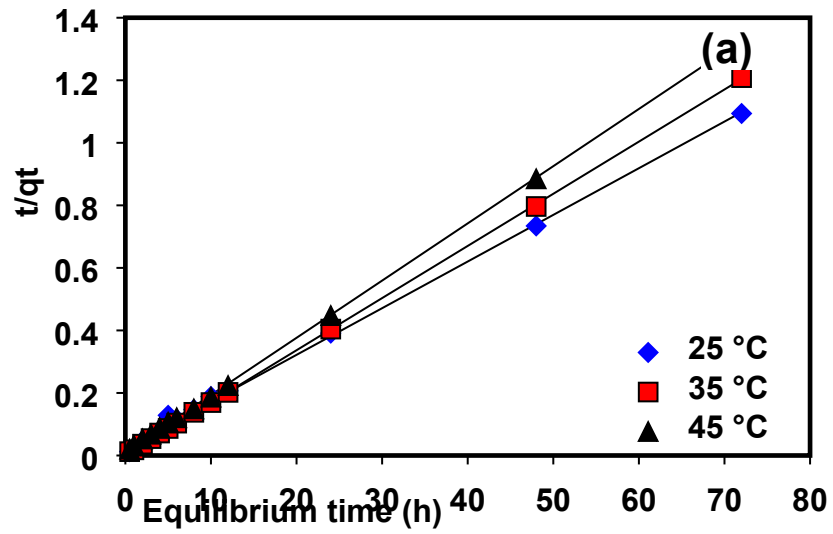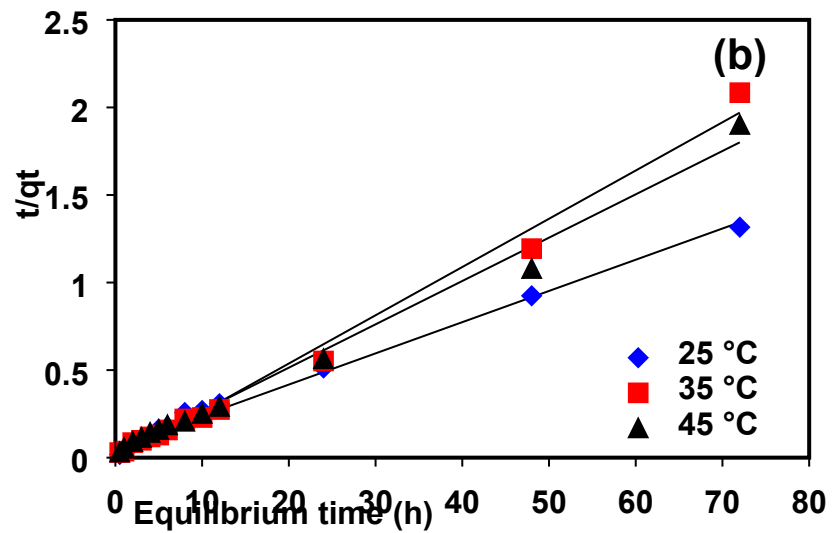

**Figure SM5. Pseudo-second-order kinetic plots for 2-NP removal by (a) CSAC and (b) MCSAC at different temperatures [initial 2-NP concentration =  $1 \times 10^{-3}$  M; pH = 4.0, adsorbent dose = 2 g/L; particle size = 50-100 B.S.S. mesh]**

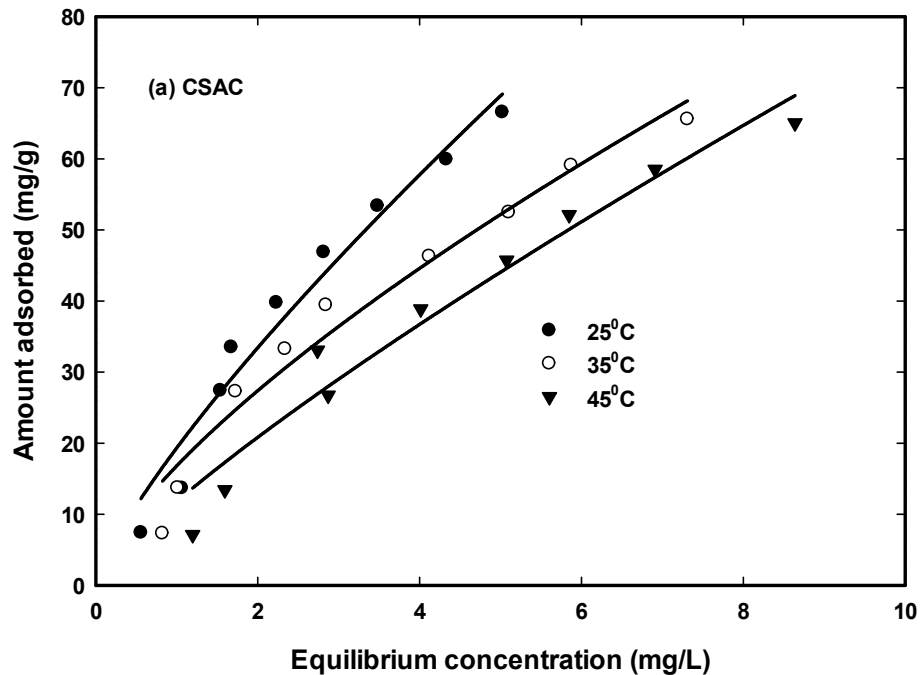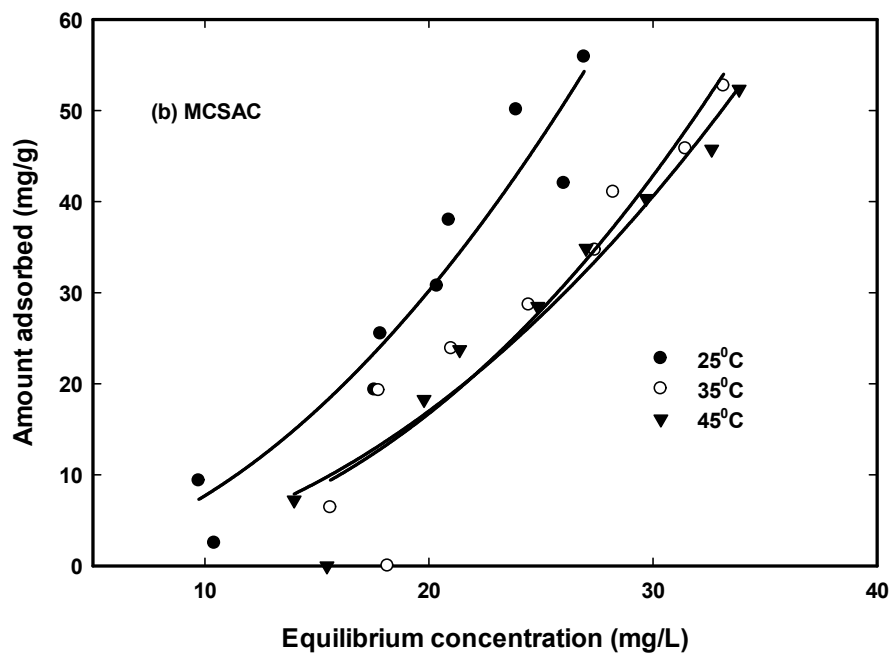

**Figure SM6. Freundlich adsorption isotherm of 2-NP by CSAC at different temperatures [pH= 4.0; initial 2-NP concentration range=  $1 \times 10^{-4}$ - $1 \times 10^{-3}$  M; adsorbent concentration= 2 g/L; particle size= 50-100 B.S.S. mesh]**

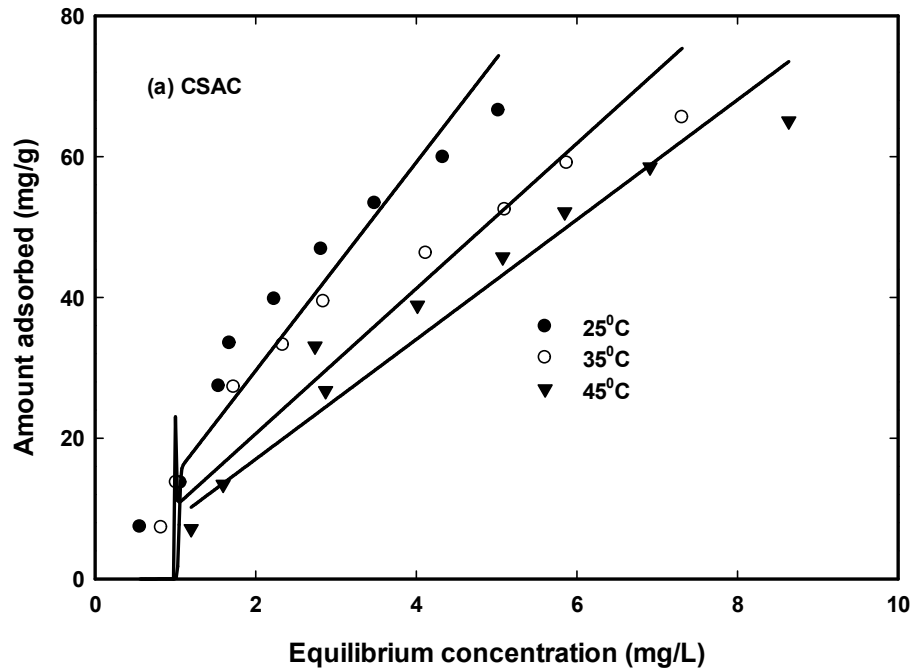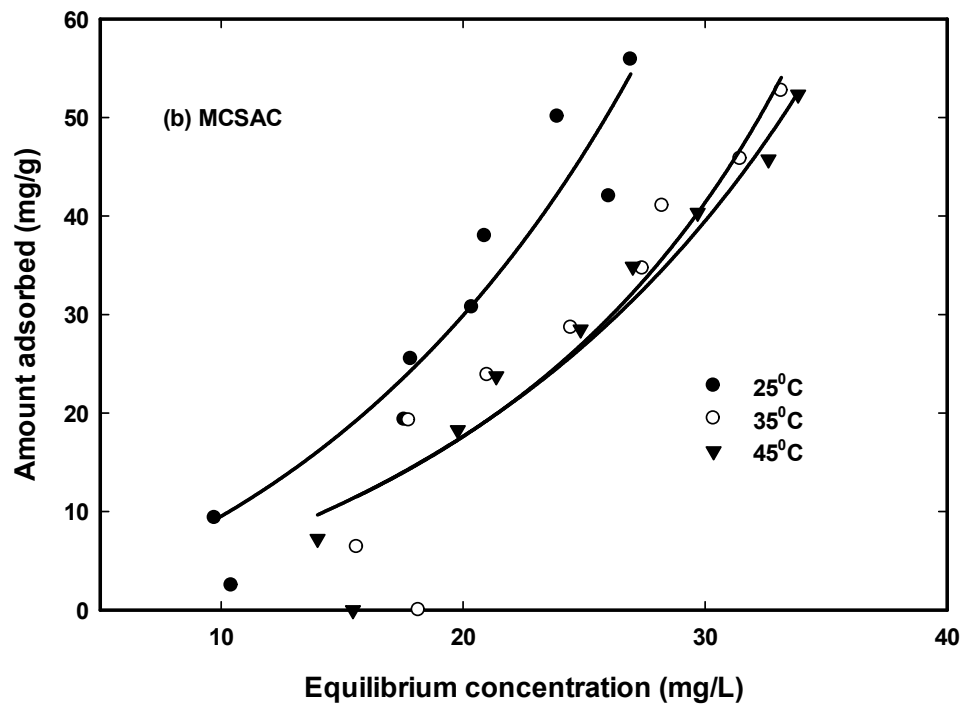

Figure SM7. Redlich Peterson adsorption isotherm of 2-NP by CSAC at different temperatures [pH= 4.0; initial 2-NP concentration range=  $1 \times 10^{-4}$ - $1 \times 10^{-3}$  M; adsorbent concentration= 2 g/L; particle size= 50-100 B.S.S. mesh]

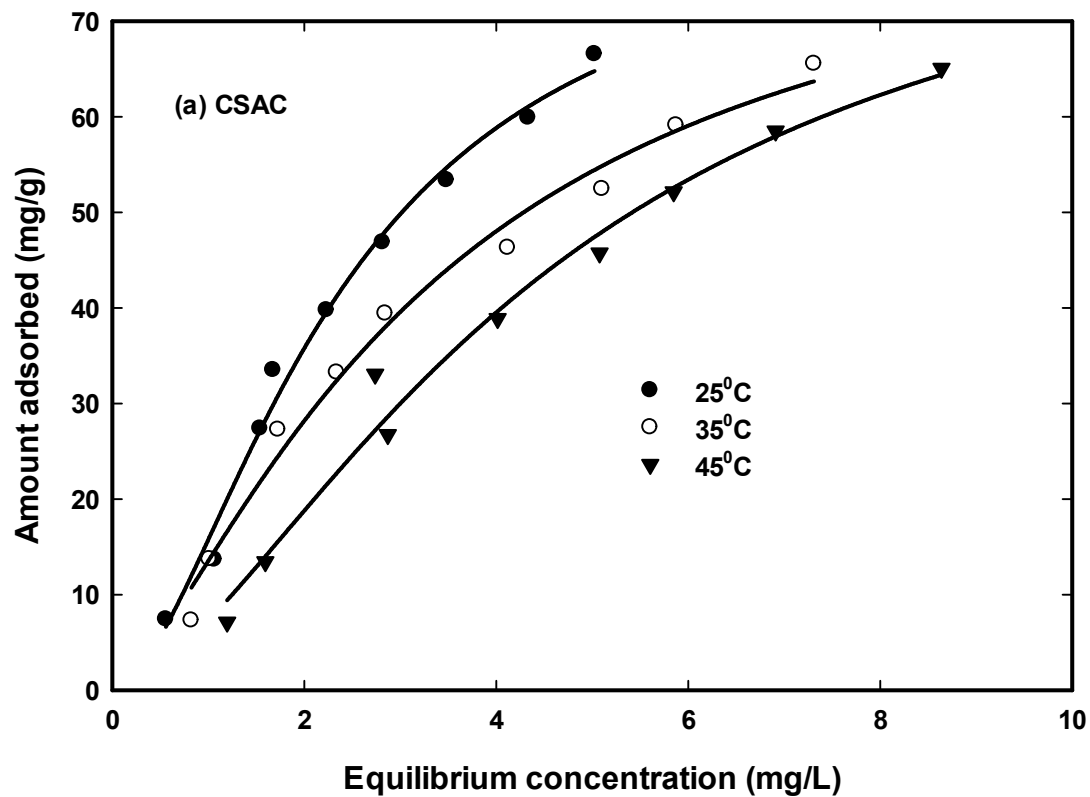

**Figure SM8. Koble adsorption isotherm of 2-NP by CSAC at different temperatures [pH= 4.0; initial 2-NP concentration range=  $1 \times 10^{-4}$ - $1 \times 10^{-3}$  M; adsorbent concentration= 2 g/L; particle size= 50-100 B.S.S. mesh]**

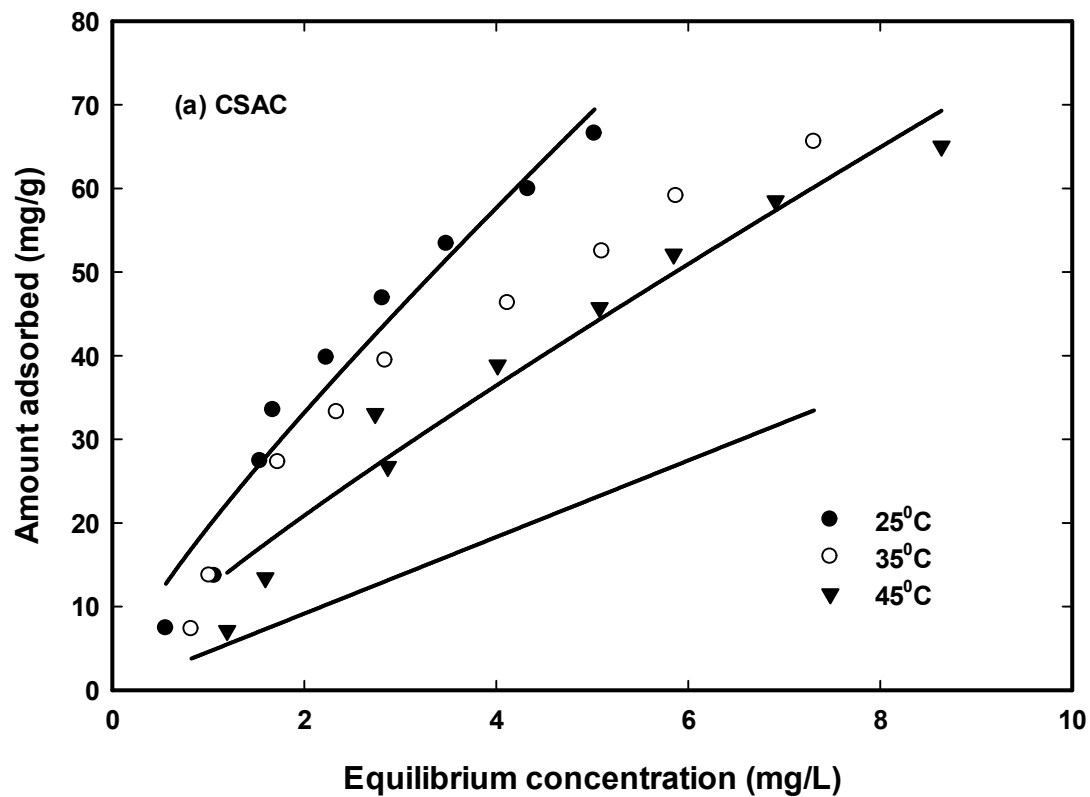

**Figure SM9. Total adsorption isotherm of 2-NP by CSAC at different temperatures [pH= 4.0; initial 2-NP concentration range=  $1 \times 10^{-4}$ - $1 \times 10^{-3}$  M; adsorbent concentration= 2 g/L; particle size= 50-100 B.S.S. mesh]**

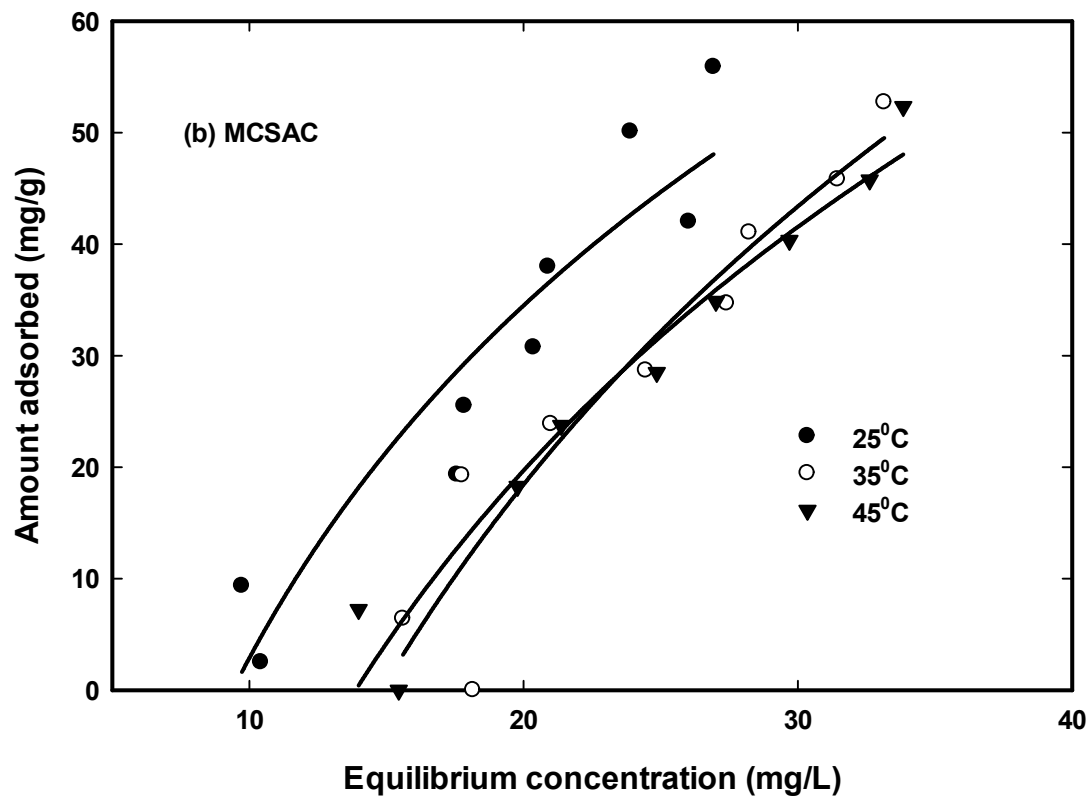

**Figure SM10. Temkin adsorption isotherm of 2-NP by CSAC at different temperatures [pH= 4.0; initial 2-NP concentration range=  $1 \times 10^{-4}$ - $1 \times 10^{-3}$  M; adsorbent concentration= 2 g/L; particle size= 50-100 B.S.S. mesh]**
